# Supplementary material for: Adolescents’ experience of mistreatment and abuse during childbirth: a cross-sectional community survey in a low-income informal settlement in Nairobi, Kenya
Source: PubMed Central journal article supplement — BMJ Glob Health. 2023 Nov 6;8(11):e013268. doi: 10.1136/bmjgh-2023-013268 (PMC10632810; doi:10.1136/bmjgh-2023-013268), 2023-11-06
Supplement: bmjgh-2023-013268supp001.pdf [file bmjgh-2023-013268supp001.pdf]

Supplementary Table 1: Measure of physical and verbal abuse and stigma and discrimination

|                                                                                                                                                                               |    |      |
|-------------------------------------------------------------------------------------------------------------------------------------------------------------------------------|----|------|
| <b>Physical abuse</b>                                                                                                                                                         |    |      |
| You were punched by a health worker or other staff?                                                                                                                           | 6  | 1.2  |
| You were kicked by a health worker or other staff                                                                                                                             | 0  |      |
| You were slapped by a health worker or other staff?                                                                                                                           | 10 | 2.0  |
| You were hit with an instrument by a health worker or staff?                                                                                                                  | 1  | 0.2  |
| You were gagged (e.g., something put across or in your mouth to prevent you from speaking or making noise) by a health worker                                                 | 5  | 1.0  |
| You were physically tied to the bed by a health worker or other staff?                                                                                                        | 2  | 0.4  |
| You were held down to the bed forcefully by a health worker or other staff?                                                                                                   | 4  | 0.8  |
| You had forceful downward pressure placed on your abdomen before the baby came out (fundal pressure)?                                                                         | 24 | 4.9  |
| <b>Verbal abuse</b>                                                                                                                                                           |    |      |
| You were shouted at or screamed at by a health worker or other staff?                                                                                                         | 95 | 19.4 |
| You were insulted by a health worker or other staff?                                                                                                                          | 47 | 9.6  |
| You were scolded by a health worker or other staff?                                                                                                                           | 55 | 11.2 |
| You were mocked by a health worker or other staff?                                                                                                                            | 37 | 7.5  |
| The health worker or other staff member made negative comments about your physical appearance (such as your weight, private parts, cleanliness, or other parts of your body)? | 22 | 4.5  |
| The health worker or other staff member made negative comments about your baby's physical appearance                                                                          | 6  | 1.2  |

|                                                                                                                           |    |      |
|---------------------------------------------------------------------------------------------------------------------------|----|------|
| The health worker or other staff member make negative comments to you regarding your sexual activity?                     | 24 | 4.9  |
| The health worker or other staff threaten you with a medical procedure (such as episiotomy or cesarean section)?          | 34 | 6.9  |
| The health worker or other staff threaten you with physical violence?                                                     | 5  | 1.0  |
| The health worker or other staff threatened that if you did not comply, you or your baby would have a poor outcome.       | 11 | 2.2  |
| The health worker or other staff threatened to withhold care from you or your baby?                                       | 10 | 2.0  |
| The health worker or other staff blamed you for something that happened to you or your baby during your time in hospital? | 12 | 2.4  |
| The health worker or other staff hissed at you during your time in hospital?                                              | 8  | 1.6  |
| <b>Stigma and discrimination</b>                                                                                          |    |      |
| A health worker or staff made negative comments to you regarding your ethnicity, race, tribe or culture?                  | 7  | 1.4  |
| A health worker or staff made negative comments to you regarding your religion?                                           | 4  | 0.8  |
| A health worker or staff made negative comments to you regarding your age?                                                | 61 | 12.5 |
| A health worker or staff made negative comments to you regarding whether you were married or not?                         | 25 | 5.1  |
| A health worker or staff made negative comments to you regarding your level of education or literacy?                     | 18 | 3.7  |
| A health worker or staff made negative comments to you                                                                    | 7  | 1.4  |

|                                                                                   |   |     |
|-----------------------------------------------------------------------------------|---|-----|
| regarding your economic circumstances?                                            |   |     |
| A health worker or staff made negative comments to you regarding your HIV status? | 4 | 0.8 |
